# Supplementary material for: A systematic review and meta-analysis of randomized controlled trials: effects of mediterranean diet and low-fat diet on liver enzymes and liver fat content of NAFLD
Source: Royal Society of Chemistry journal article supplement (doi:10.1039/d4fo01461h), 2024-01-01
Supplement: d4fo01461h2.pdf [file d4fo01461h2.pdf]

## MD&LFD for NAFLD

Patient or population: patients with NAFLD

Settings:

Intervention: MD&LFD

| Outcomes | Illustrative comparative risks* (95% CI) |                                                                                                                   | Relative effect (95% CI) | No of Participants (studies) | Quality of the evidence (GRADE) | Comments                  |
|----------|------------------------------------------|-------------------------------------------------------------------------------------------------------------------|--------------------------|------------------------------|---------------------------------|---------------------------|
|          | Assumed risk Control                     | Corresponding risk MD&LFD                                                                                         |                          |                              |                                 |                           |
| TG       |                                          | The mean tg in the intervention groups was <b>0.03 standard deviations higher</b> (0.37 lower to 0.42 higher)     |                          | 100 (3 studies)              | ⊕⊕⊕⊖<br>moderate <sup>1</sup>   | SMD 0.03 (-0.37 to 0.42)  |
| TC       |                                          | The mean tc in the intervention groups was <b>0.33 standard deviations lower</b> (0.84 lower to 0.19 higher)      |                          | 73 (2 studies)               | ⊕⊕⊖⊖<br>low <sup>1,2</sup>      | SMD -0.33 (-0.84 to 0.19) |
| HDL-C    |                                          | The mean hdl-c in the intervention groups was <b>0.02 standard deviations higher</b> (0.69 lower to 0.74 higher)  |                          | 124 (4 studies)              | ⊕⊕⊕⊖<br>moderate <sup>1</sup>   | SMD 0.02 (-0.69 to 0.74)  |
| LDL-C    |                                          | The mean ldl-c in the intervention groups was <b>0.17 standard deviations lower</b> (0.59 lower to 0.25 higher)   |                          | 112 (3 studies)              | ⊕⊕⊕⊖<br>moderate <sup>1</sup>   | SMD -0.17 (-0.59 to 0.25) |
| ALT      |                                          | The mean alt in the intervention groups was <b>0.16 standard deviations higher</b> (0.28 lower to 0.59 higher)    |                          | 124 (4 studies)              | ⊕⊕⊕⊖<br>moderate <sup>1</sup>   | SMD 0.16 (-0.28 to 0.59)  |
| GGT      |                                          | The mean ggt in the intervention groups was <b>0.05 standard deviations lower</b> (0.5 lower to 0.41 higher)      |                          | 75 (3 studies)               | ⊕⊕⊖⊖<br>low <sup>1,3</sup>      | SMD -0.05 (-0.5 to 0.41)  |
| HOMA-IR  |                                          | The mean homa-ir in the intervention groups was <b>0.13 standard deviations lower</b> (0.58 lower to 0.32 higher) |                          | 100 (3 studies)              | ⊕⊖⊖⊖<br>very low <sup>1,4</sup> | SMD -0.13 (-0.58 to 0.32) |
| LSM      |                                          | The mean lsm in the intervention groups was <b>0.03 standard deviations higher</b> (0.74 lower to 0.79 higher)    |                          | 88 (2 studies)               | ⊕⊕⊖⊖<br>low <sup>1,2</sup>      | SMD 0.03 (-0.74 to 0.79)  |
| IHL      |                                          | The mean ihl in the intervention groups was <b>0.53 standard deviations higher</b> (0.8 lower to 1.86 higher)     |                          | 51 (2 studies)               | ⊕⊕⊖⊖<br>low <sup>1,2,5</sup>    | SMD 0.53 (-0.8 to 1.86)   |
| Weight   |                                          | The mean weight in the intervention groups was <b>0.23 standard deviations higher</b> (0.13 lower to 0.58 higher) |                          | 124 (4 studies)              | ⊕⊕⊕⊖<br>moderate <sup>1,6</sup> | SMD 0.23 (-0.13 to 0.58)  |
| WC       |                                          | The mean wc in the intervention groups was <b>0.12 standard deviations higher</b> (0.5 lower to 0.74 higher)      |                          | 124 (4 studies)              | ⊕⊕⊕⊖<br>moderate <sup>1</sup>   | SMD 0.12 (-0.5 to 0.74)   |
| BMI      |                                          | The mean bmi in the intervention groups was <b>0.14 standard deviations higher</b> (0.21 lower to 0.5 higher)     |                          | 124 (4 studies)              | ⊕⊕⊕⊖<br>moderate <sup>1</sup>   | SMD 0.14 (-0.21 to 0.5)   |

\*The basis for the **assumed risk** (e.g. the median control group risk across studies) is provided in footnotes. The **corresponding risk** (and its 95% confidence interval) is based on the assumed risk in the comparison group and the **relative effect** of the intervention (and its 95% CI).

CI: Confidence interval;

GRADE Working Group grades of evidence

**High quality:** Further research is very unlikely to change our confidence in the estimate of effect.

**Moderate quality:** Further research is likely to have an important impact on our confidence in the estimate of effect and may change the estimate.

**Low quality:** Further research is very likely to have an important impact on our confidence in the estimate of effect and is likely to change the estimate.

**Very low quality:** We are very uncertain about the estimate.

<sup>1</sup> Participants and experimenters were single-blind

<sup>2</sup> Two studies did not report on this indicator, which could result in a two-level drop in study quality

<sup>3</sup> Properzi, C. 2018 results showed that MD was superior to the LFD diet, and the results of the remaining three studies showed no significant difference between MD and LFD for NAFLD, so the quality of the evidence declines at the level

<sup>4</sup> Two studies, George, E. S. 2022 and Properzi, C. 2018, showed that LFD had better therapeutic effects than the MD diet, while Ryan, M. C. 2013 showed MD had better effects than LFD, and Ristic-Medic, D. 2020 showed no significant differences between MD and LFD in NAFLD therapy, thereby reducing the quality of evidence to two levels.

<sup>5</sup> The results of George, E. S. 2022 showed that LFD had better therapeutic effects than the MD diet, while Ryan, M. C. 2013 showed MD had better effects than LFD, and the remaining two studies showed no significant difference between MD and LFD in NAFLD therapy, thus reducing the quality of the evidence.

<sup>6</sup> No explanation was provided
