# Supplementary material for: A systematic review and meta-analysis of randomized controlled trials: effects of mediterranean diet and low-fat diet on liver enzymes and liver fat content of NAFLD
Source: Royal Society of Chemistry journal article supplement (doi:10.1039/d4fo01461h), 2024-01-01
Supplement: d4fo01461h4.pdf [file d4fo01461h4.pdf]

### Search Strategy

We made our search strategy by referring to the articles of the relevant systematic review (Lorenzo A. Orci et al 2022 <sup>1</sup>).

#### PubMed

#1: ("Diet, Mediterranean"[Mesh]) OR (((Mediterranean Diet) OR (Diets, Mediterranean)) OR (Mediterranean Diets))

**N=11,563**

#2: ("Diet, Fat-Restricted"[Mesh]) OR (((((((((((Diet, Fat Restricted) OR (Fat-Restricted Diet)) OR (Diets, Fat-Restricted)) OR (Fat Restricted Diet)) OR (Fat-Restricted Diets)) OR (Diet, Low-Fat)) OR (Diet, Low Fat)) OR (Diets, Low-Fat)) OR (Low-Fat Diet)) OR (Low-Fat Diets)) OR (Diet, Fat-Free)) OR (Diet, Fat Free)) OR (Diets, Fat-Free)) OR (Fat-Free Diet)) OR (Fat-Free Diets))

**N=46,016**

#3: ("Non-alcoholic Fatty Liver Disease"[Mesh]) OR (((((((((((Non-alcoholic Fatty Liver Disease) OR (NAFLD)) OR (Nonalcoholic Fatty Liver Disease)) OR (Fatty Liver, Nonalcoholic)) OR (Fatty Livers, Nonalcoholic)) OR (Liver, Nonalcoholic Fatty)) OR (Livers, Nonalcoholic Fatty)) OR (Nonalcoholic Fatty Liver)) OR (Nonalcoholic Fatty Livers)) OR (Nonalcoholic Steatohepatitis)) OR (Steatohepatitides, Nonalcoholic)) OR (Steatohepatitis, Nonalcoholic))

**N=46,344**

#4: #1 AND #2 AND #3

**N=54**

#### Web Of Science

#1: (((TS=(Diet, Mediterranean) OR TS=(Mediterranean Diet) OR TS=(Diets, Mediterranean) OR TS=(Mediterranean Diets) and Preprint Citation Index (Exclude - Database)

**N=44,146**

#2: (((((((((((TS=(Diet, Fat-Restricted)) OR TS=(Diet, Fat Restricted)) OR TS=(Fat-Restricted Diet)) OR TS=(Diets, Fat-Restricted)) OR TS=(Fat Restricted Diet)) OR

TS=(Fat-Restricted Diets)) OR TS=(Diet, Low-Fat)) OR TS=(Diet, Low Fat)) OR TS=(Diets, Low-Fat)) OR TS=(Low-Fat Diet)) OR TS=(Low-Fat Diets)) OR TS=(Diet, Fat-Free) OR TS=(Diet, Fat Free)) OR TS=(Diets, Fat-Free)) OR TS=(Fat-Free Diet)) OR TS=(Fat-Free Diets) and Preprint Citation Index (Exclude- Database)

**N=129,841**

#3: (((((((TS=(Non-alcoholic Fatty Liver Disease)) OR TS=(Non-alcoholic Fatty Liver Disease) OR TS=(NAFLD)) OR TS=(Nonalcoholic Fatty Liver Disease)) OR TS=(Fatty Liver, Nonalcoholic)) OR TS=(Fatty Livers, Nonalcoholic) OR TS=(Liver, Nonalcoholic Fatty)) OR TS=(Livers, Nonalcoholic Fatty)) OR TS=(Nonalcoholic Fatty Liver)) OR TS=(Nonalcoholic Fatty Livers)) OR TS=(Nonalcoholic Steatohepatitis)) OR TS=(Steatohepatitides, Nonalcoholic)) OR TS=(Steatohepatitis, Nonalcoholic) and Preprint Citation Index (Exclude - Database)

**N=720**

#4: #1 AND #2 AND #3

**N=163**

## **Medline**

S1: TX Diet, Mediterranean OR TX Mediterranean Diet OR TX Diets, Mediterranean OR TX Mediterranean Diets

**N=24,131**

S2: TX Diet, Fat-Restricted OR TX Diet, Fat Restricted OR TX Fat Restricted Diet OR TX Diets, Fat-Restricted OR TX Fat Restricted Diet OR TX Fat-Restricted Diets OR TX Diet, Low Fat OR TX Diet, Low Fat OR TX Diets, Low-Fat OR TX Low-Fat Diet OR TX Low-Fat Diets OR TX Diet, Fat-Free

**N=34,091**

S3: TX Non-alcoholic Fatty Liver Disease OR TX Non-alcoholic Fatty Liver Disease OR TX NAFLD OR TX Nonalcoholic Fatty Liver Disease OR TX Fatty Liver, Nonalcoholic OR TX Fatty Livers, Nonalcoholic OR TX Liver, Nonalcoholic Fatty OR TX Livers, Nonalcoholic Fatty OR TX Nonalcoholic Fatty Liver OR TX Nonalcoholic Fatty Livers

OR TX Nonalcoholic Steatohepatitis OR TX Steatohepatitides, Nonalcoholic

**N=85,206**

S4: S1 AND S2 AND S3

**N=496**

### **Scopus**

#1: (TITLE-ABS-KEY (diet, AND mediterranean) OR TITLE-ABS-KEY (mediterranean AND diet) OR TITLE-ABS-KEY (diets, AND mediterranean) OR TITLE-ABS-KEY (mediterranean AND diets))

**N=19,451**

#2: (TITLE-ABS-KEY (diet, AND fat-restricted) OR TITLE-ABS-KEY (diet, AND fat AND restricted) OR TITLE-ABS-KEY (fat-restricted AND diet) OR TITLE-ABS-KEY (diets, AND fat-restricted) OR TITLE-ABS-KEY (fat AND restricted AND diet) OR TITLE-ABS-KEY (fat-restricted AND diets) OR TITLE-ABS-KEY (diet, AND low-fat) OR TITLE-ABS-KEY (diet, AND low AND fat) OR TITLE-ABS-KEY (diets, AND low-fat) OR TITLE-ABS-KEY (low-fat AND diet) OR TITLE-ABS-KEY (low-fat AND diets) OR TITLE-ABS-KEY (diet, AND fat-free) OR TITLE-ABS-KEY (diet, AND fat AND free) OR TITLE-ABS-KEY (diets, AND fat-free) OR TITLE-ABS-KEY (fat-free AND diet) OR TITLE-ABS-KEY (fat-free AND diets))

**N=83,101**

#3: (TITLE-ABS-KEY (non-alcoholic AND fatty AND liver AND disease) OR TITLE-ABS-KEY (non-alcoholic AND fatty AND liver AND disease) OR TITLE-ABS-KEY (nafld) OR TITLE-ABS-KEY (nonalcoholic AND fatty AND liver AND disease) OR TITLE-ABS-KEY (fatty AND liver, AND nonalcoholic) OR TITLE-ABS-KEY (fatty AND livers, AND nonalcoholic) OR TITLE-ABS-KEY (liver, AND nonalcoholic AND fatty) OR TITLE-ABS-KEY (livers, AND nonalcoholic AND fatty) OR TITLE-ABS-KEY (nonalcoholic AND fatty AND liver) OR TITLE-ABS-KEY (nonalcoholic AND fatty AND livers) OR TITLE-ABS-KEY (nonalcoholic AND steatohepatitis) OR TITLE-ABS-KEY (steatohepatitides, AND nonalcoholic) OR TITLE-ABS-KEY (steatohepatitis, AND nonalcoholic))

**N=61,404**

#4: #1 AND #2 AND #3

**N=151**

**Embase**

#1: 'diet, mediterranean'/exp OR 'diet, mediterranean' OR (('diet, '/exp OR diet,) AND ('mediterranean'/exp OR mediterranean)) OR (mediterranean AND diet) OR (diets, AND mediterranean) OR (mediterranean AND diets)

**N=18,653**

#2: diet, AND 'fat restricted' OR (diet, AND fat AND restricted) OR ('fat restricted' AND diet) OR (diets, AND 'fat restricted') OR (fat AND restricted AND diet) OR ('fat restricted' AND diets) OR (diet, AND 'low fat') OR (diet, AND low AND fat) OR (diets, AND 'low fat') OR ('low fat' AND diet) OR ('low fat' AND diets) OR (diet, AND 'fat free') OR (diet, AND fat AND free) OR (diets, AND 'fat free') OR ('fat free' AND diet) OR ('fat free' AND diets)

**N=81,680**

#3: 'non alcoholic' AND fatty AND liver AND disease OR nafld OR (nonalcoholic AND fatty AND liver AND disease) OR (fatty AND liver, AND nonalcoholic) OR ('fat restricted' AND diets) OR (fatty AND livers, AND nonalcoholic) OR (liver, AND nonalcoholic AND fatty) OR (livers, AND nonalcoholic AND fatty) OR (nonalcoholic AND fatty AND liver) OR (nonalcoholic AND fatty AND livers) OR (nonalcoholic AND steatohepatitis) OR (steatohepatitides, AND nonalcoholic) OR (steatohepatitis, AND nonalcoholic)

**N=85,844**

#4: #1 AND #2 AND #3

**N=182**

\*Note on restrictions: No time or language restrictions.

1. L. A. Orci, M. Sanduzzi-Zamparelli, B. Caballol, V. Sapena, N. Colucci, F. Torres, J. Bruix, M. Reig and C. Toso, Incidence of Hepatocellular Carcinoma in Patients With Nonalcoholic Fatty Liver Disease: A Systematic Review, Meta-analysis, and Meta-regression, *Clinical Gastroenterology and Hepatology*, 2022, **20**, 283-292.e210.
