# Supplementary material for: A systematic review and meta-analysis of randomized controlled trials: effects of mediterranean diet and low-fat diet on liver enzymes and liver fat content of NAFLD
Source: Royal Society of Chemistry journal article supplement (doi:10.1039/d4fo01461h), 2024-01-01
Supplement: d4fo01461h6.xlsx [file d4fo01461h6.xlsx]

## Sheet: Sheet1
Author	Year	Title	Reason for exclusion
Petrovic, Hristina et al.	2010	Non-alcoholic fat liver disease in obese and prediabetic patients	Meeting Abstract
Papamiltiadous, Elena S et al.	2016	A randomised controlled trial of a Mediterranean Dietary Intervention for Adults with Non Alcoholic Fatty Liver Disease (MEDINA): Study protocol	Study protocol
Properzi, Catherine et al.	2017	Hepatic steatosis is significantly reduced by either a low-fat or a Mediterranean-style diet in patients with non-alcoholic fatty liver disease	Meeting Abstract
Baker, Holly	2018	Mediterranean and low-fat diets for NAFLD	News Item
Galarregui, Cristina et al.	2018	Hepatic status and adherence to a mediterranean dietary pattern in obese subjects with non-alcoholic fatty liver disease	Meeting Abstract
Targher, Giovanni, and Christopher D Byrne.	2018	Ad Libitum Mediterranean or Low-Fat Diets as Treatments for Nonalcoholic Fatty Liver Disease?	EDITORIALS
D'Ambrosio, Marilena et al.	2019	A pilot-study on lifestyle modifications in patients with fatty liver disease living in Southern Italy	Meeting Abstract
Martin, Martin, Franz et al.	2021	Low hypocaloric mediterranean diet versus standard diet in biopsy proven nafld patients	Meeting Abstract
Yiannakou, Ioanna et al.	2022	HIGHER DIET QUALITY IS ASSOCIATED WITH LOWER NON-ALCOHOLIC FATTY LIVER DISEASE IN THE FRAMINGHAM HEART STUDY	Meeting Abstract
Galerati, Ilaria et al.	2023	Nonalcoholic fatty liver, adherence to Mediterranean diet and cardio-metabolic risk	Meeting Abstract
Quetglas-Llabres, Maria Magdalena et al.	2023	Higher adherence to the Mediterranean Diet improves liver steatosis and erythrocyte antioxidant defences in patients with Non-Alcoholic Fatty Liver Disease	Meeting Abstract
Centis, Elena et al.	2010	The effect of lifestyle changes in non-alcoholic fatty liver disease	Review Article
Lonardo, Amedeo et al.	2010	Clinical physiology of NAFLD: A critical overview of pathogenesis and treatment	Review Article
Jun, Dae Won	2017	Association between a High-fat Low-carbohydrate Diet and Non-alcoholic Fatty Liver Disease: Truth or Myth?	Review Article
Watanabe, Mikiko et al.	2020	Baseline HOMA IR and Circulating FGF21 Levels Predict NAFLD Improvement in Patients Undergoing a Low Carbohydrate Dietary Intervention for Weight Loss: A Prospective Observational Pilot Study	The research type is non-randomized controlled experiment
Watzinger, Cora et al.	2020	Dietary Factors in Relation to Liver Fat Content: A Cross-sectional Study	The research type is non-randomized controlled experiment
Miryan, Mahsa et al.	2023	Relationship between the Mediterranean diet and risk of hepatic fibrosis in patients with non-alcoholic fatty liver disease: A cross-sectional analysis of the RaNCD cohort	The research type is non-randomized controlled experiment
Kontogianni, Meropi D et al.	2014	Adherence to the Mediterranean diet is associated with the severity of non-alcoholic fatty liver disease	Dietary intervention lacks low-fat diet
Mohseni, Tatemeh etal.	2016	ADHERENCE TO MEDITERRANEAN NUTRITION PATTERN IN PATIENTS WITH NON-ALCOHOLIC FATTY LIVER DISEASE: RELATIONSHIP WITH METABOLIC RISK FACTORS AND-UCP2-866G/A GENE POLYMORPHISMS	Dietary intervention lacks low-fat diet
Yamazaki, Tomomi et al.	2016	The effects on weight loss and gene expression in adipose and hepatic tissues of very-low carbohydrate and low-fat isoenergetic diets in diet-induced obese mice	Dietary intervention lacked Mediterranean diet, and the experimental subjects were mice
Abenavoli, Ludovico et al.	2017	Effect of Mediterranean Diet and Antioxidant Formulation in Non-Alcoholic Fatty Liver Disease: A Randomized Study	Dietary intervention lacks low-fat diet
Khalatbari-Soltani, Saman et al.	2019	The association between adherence to the Mediterranean diet and hepatic steatosis: cross-sectional analysis of two independent studies, the UK Fenland Study and the Swiss CoLaus Study	Dietary intervention lacks low-fat diet
Marin-Alejandre, Bertha Araceli et al.	2019	The metabolic and hepatic impact of two personalized dietary strategies in subjects with obesity and nonalcoholic fatty liver disease: The fatty liver in obesity (FLiO) randomized controlled trial	Dietary intervention lacks low-fat diet
Pintó, Xavier et al.	2019	A Mediterranean Diet Rich in Extra-Virgin Olive Oil Is Associated with a Reduced Prevalence of Nonalcoholic Fatty Liver Disease in Older Individuals at High Cardiovascular Risk	Dietary intervention lacks low-fat diet
Biolato, Marco et al.	2019	Intestinal permeability after Mediterranean diet and low-fat diet in non-alcoholic fatty liver disease	The study explored the effects of MD and LFD on the intestinal permeability of NAFLD patients but did not explore the effects on liver enzymes or liver fat content
Campanella, Angelo et al.	2020	The effect of three mediterranean diets on remnant cholesterol and non-alcoholic fatty liver disease: A secondary analysis	Dietary intervention lacks low-fat diet.
Jablonka, Ronnie	2020	Enfermedad Por hígado Graso No alcohólico y Dieta mediterránea En Participantes De La Cohorte MAUCO: Nonalcoholic Fatty Liver Disease and Mediterranean Diet in Participants of the Mauco Cohort	Dietary intervention lacks low-fat diet
Entezari, Mohammad-Reza et al.	2021	Mediterranean dietary pattern and non-alcoholic fatty liver diseases: a case-control study	Dietary intervention lacks low-fat diet
Wu, Na et al.	2021	Effect of exercise and diet intervention in NAFLD and NASH via GAB2 methylation	Dietary intervention lacks Mediterranean diet
Calabrese, Francesco Maria et al.	2023	Synergistic Effect of Diet and Physical Activity on a NAFLD Cohort: Metabolomics Profile and Clinical Variable Evaluation	Dietary intervention lacks low-fat diet
Castelnuovo, Gabriele et al.	2023	Impact of Chronotype and Mediterranean Diet on the Risk of Liver Fibrosis in Patients with Non-Alcoholic Fatty Liver Disease	Dietary intervention lacks low-fat diet
Fateh, Hawal Lateef et al.	2023	Comparing effects of beetroot juice and Mediterranean diet on liver enzymes and sonographic appearance in patients with non-alcoholic fatty liver disease: a randomized control trials	Dietary intervention lacks low-fat diet
Garicano Vilar, Elena et al.	2023	Effect of MetioNac® in patients with metabolic syndrome who are at risk of metabolic dysfunction associated fatty liver disease: a randomized controlled trial	Dietary intervention lacks low-fat diet
Monserrat-Mesquida, Margalida et al.	2023	Plasma Fatty Acid Composition, Oxidative and Inflammatory Status, and Adherence to the Mediterranean Diet of Patients with Non-Alcoholic Fatty Liver Disease	Dietary intervention lacks low-fat diet
Rooholahzadegan, Farnaz	2023	The effect of DASH diet on glycemic response, meta-inflammation and serum LPS in obese patients with NAFLD: a double-blind controlled randomized clinical trial	Dietary intervention lacks both Mediterranean diet and low-fat diet
Ali, Hassam et al.	2024	Non-Pharmacological Approach to Diet and Exercise in Metabolic-Associated Fatty Liver Disease: Bridging the Gap between Research and Clinical Practice	Dietary intervention lacks both Mediterranean diet and low-fat diet
Chooi, Yu Chung et al.	2024	Effect of an Asian-adapted Mediterranean diet and pentadecanoic acid on fatty liver disease: the TANGO randomized controlled trial	Dietary intervention lacks low-fat diet
Yokose, Chio et al.	2020	Effects of Low-Fat, Mediterranean, or Low-Carbohydrate Weight Loss Diets on Serum Urate and Cardiometabolic Risk Factors: A Secondary Analysis of the Dietary Intervention Randomized Controlled Trial (DIRECT)	Unconventional Mediterranean/low-fat diet
Yaskolka Meir, Anat et al.	2021	Effect of green-Mediterranean diet on intrahepatic fat: The DIRECT plus randomised controlled trial	Unconventional Mediterranean diet
Álvarez-Amor, Leticia et al.	2021	Extra virgin olive oil improved body weight and insulin sensitivity in high fat diet-induced obese LDLr-/-.Leiden mice without attenuation of steatohepatitis	The subjects were Leiden mice
Poeta, Marco, and Pietro Vajro.	2017	Mediterranean diet to prevent/treat nonalcoholic fatty liver disease in children: A promising approach	The subjects were children
Akbulut, Ulas Emre et al.	2022	The effect of a Mediterranean diet vs. a low-fat diet on non-alcoholic fatty liver disease in children: a randomized trial	The subjects were children
Yurtdaş, Gamze et al.	2022	The effects of Mediterranean diet on hepatic steatosis, oxidative stress, and inflammation in adolescents with non-alcoholic fatty liver disease: A randomized controlled trial	The subjects were adolescents
